# Supplementary material for: Harmful cultural practices during perinatal period and associated factors among women of childbearing age in Southern Ethiopia: Community based cross-sectional study
Source: PubMed Central journal article supplement (PMC8253409; doi:10.1371/journal.pone.0254095), 2021-07-02
Supplement: pone.0254095.s001.pdf [file pone.0254095.s001.pdf]

**English Version Questionnaire**

**Interview Record for Quantitative Data      Identification Number**

*Cultural malpractice during perinatal period and associated factors among women of childbearing age in Southern Ethiopia: 2019/20*

| S.No                                              | Question             | Response                                                                               | Skip |
|---------------------------------------------------|----------------------|----------------------------------------------------------------------------------------|------|
| .                                                 |                      |                                                                                        |      |
| <b>Part I: Socio- demographic Characteristics</b> |                      |                                                                                        |      |
| 101                                               | Age of the mother    | /_____ / in complete year                                                              |      |
| 102                                               | Religion             | 1. Orthodox<br>2. Catholic<br>3. Protestant<br>4. Other, Specify _____                 |      |
| 103                                               | Ethnicity            | 1. Gurage<br>2. Amhara<br>3. Oromo<br>4. Tigray<br>5. Other, Specify _____             |      |
| 104                                               | Occupational status: | 1. House wife<br>2. Gove't employee<br>3. Merchant<br>4. Student<br>5. Other (specify) |      |
| 105                                               | Marital status       | 1. Married<br>2. Divorce<br>3. Widowed                                                 |      |
| 106                                               | Place of residence   | 1. Urban<br>2. Rural                                                                   |      |

|                                                                  |                                                          |                                                                                                                                                                                              |  |
|------------------------------------------------------------------|----------------------------------------------------------|----------------------------------------------------------------------------------------------------------------------------------------------------------------------------------------------|--|
| 107                                                              | Educational status of mother                             | <ol style="list-style-type: none"> <li>1. Cannot able to read and write</li> <li>2. Can read and write</li> <li>3. Grade 1-8</li> <li>4. Grade 9-12</li> <li>5. College and above</li> </ol> |  |
| 108                                                              | Average monthly income                                   | / _____ / in ETH birr                                                                                                                                                                        |  |
| <b>Part II: Obstetrics characteristics of study participants</b> |                                                          |                                                                                                                                                                                              |  |
| 201                                                              | How many delivery have you ever had                      | ----- in number                                                                                                                                                                              |  |
| 202                                                              | Who attend your last childbirth?                         | <ol style="list-style-type: none"> <li>1. Family</li> <li>2. Neighbors</li> <li>3. Relatives</li> <li>4. Trained traditional birth attendant</li> <li>5. Other</li> </ol>                    |  |
| 203                                                              | Do you have ANC follow up during the last childbirth?    | <ol style="list-style-type: none"> <li>1. Yes</li> <li>2. No. if you say “yes”</li> </ol>                                                                                                    |  |
| 204                                                              | Where you have taken antenatal care?                     | <ol style="list-style-type: none"> <li>1. Government Health facility</li> <li>2. Private Health facility</li> </ol>                                                                          |  |
| 205                                                              | Travel time to health institution                        | _____ [KM]?                                                                                                                                                                                  |  |
| <b>III Cultural mal practice during perinatal period</b>         |                                                          |                                                                                                                                                                                              |  |
| 301                                                              | Did you make any food prohibition during your pregnancy? | <ol style="list-style-type: none"> <li>1. Yes</li> <li>2. No</li> </ol>                                                                                                                      |  |
| 302                                                              | If yes, specify the type of food prohibited              | _____                                                                                                                                                                                        |  |
| 303                                                              | Did you use abdominal massage with butter during labour? | <ol style="list-style-type: none"> <li>1. Yes</li> <li>2. No</li> </ol>                                                                                                                      |  |

|     |                                                               |                                                                                                              |  |
|-----|---------------------------------------------------------------|--------------------------------------------------------------------------------------------------------------|--|
| 304 | Have you drink kosso during pregnancy?                        | 1. Yes<br>2. No                                                                                              |  |
| 305 | Have you drink telba during pregnancy?                        | 1. Yes<br>2. No                                                                                              |  |
| 306 | Where did you deliver your last child?                        | 1. Home<br>2. Health facility                                                                                |  |
| 307 | What instrument used to cut cord?                             | 1. Boiled new blade<br>2. Unclean blade used before<br>3. UN boiled new blade<br>4. Boiled blade used before |  |
| 308 | Was the umbilical cord tied?                                  | 1. Yes<br>2. No                                                                                              |  |
| 308 | If yes, what type of thread do you use?                       | 1. Boiled thread<br>2. unclean thread<br>3. other                                                            |  |
| 309 | What was given for the new born body immediately after birth? | 1. Butter<br>2. Cow milk<br>3. Water<br>4. nothing                                                           |  |
| 310 | When the child was started breast milk?                       | 1. Immediately (within 1 hour)<br>2. Within 1-24 hours<br>3. After 24 hours<br>4. other (specify) _____      |  |
| 311 | Did you give colostrum to new born?                           | 1. Yes<br>2. No                                                                                              |  |
| 312 | When did you wash the new born after delivery                 | 1. Immediately (with in 1 hour)<br>2. Within 1-24 hour<br>3. After 24 hour<br>4. Other Specify _____         |  |
| 313 | Did you have any health                                       | 1. Yes                                                                                                       |  |

|     |                                                                                            |                                                                                                     |  |
|-----|--------------------------------------------------------------------------------------------|-----------------------------------------------------------------------------------------------------|--|
|     | problem?                                                                                   | 2. No                                                                                               |  |
| 314 | If yes, where did you get sick help?                                                       | 1. Health institution<br>2. Religious<br>3. Traditional healer<br>4. Other (specify)_____           |  |
| 315 | How long after birth did you first put the baby on the breast?                             | 1. Immediately after delivery<br>2. Within one hour after delivery<br>3. After one hour of delivery |  |
| 316 | Did you give the first liquid (colostrum) that came out from your breasts?                 | 1. Yes<br>2. No                                                                                     |  |
| 317 | What did you do with the first liquid (colostrum)?                                         | _____                                                                                               |  |
| 317 | Did you give anything to drink other than breast milk in the first three days after birth? | 1. Yes<br>2. No                                                                                     |  |
| 318 | If the above answer is “Yes”, which fluid you gave?                                        | 1. Plain water<br>2. Butter<br>3. Animal Milk<br>4. Honey<br>5. Other, Specify_____                 |  |

### Amharic Version Questionnaire

#### ክፍል አንድ፡ የማህበራዊና ስነህዝባዊ ስብጥር መረጃ

1. እድሜ? \_\_\_\_\_ በአመት

2 እምነት፡- 1  ሙስሊም 2  ኦርቶዶክስ 3  ፕሮቴስታንት 4  ሌላ

3. ብሄር፡- 1  ኦሮሞ 2  አማራ 3.  ትግሬ 4  ጉራጌ 5  ሌላ

4. የስራ ሁኔታ፡- 1  የቤት እመቤት 2  የመንግስት ሰራተኛ 3  ነጋዴ 4  ተማሪ 5  ሌላ

5. የትዳር ሁኔታ፡- 1  ያገባች 2  ያላገባች 3  የተፋታች 4  ባሏቸው ተባብረው 5  ሌላ

6. የትምህርት ሁኔታ፡ 1. ማንበብ እና መጻፍ የምችል 2. የመጀመሪያ ደረጃ  
3. ሁለተኛ ደረጃ 4. መሰናዶ እና ከዛ በላይ

7. የቤተሰብ ወራዊ ግቢ \_\_\_\_\_ በብር

8. ጤና ተቋም ለመሀደ ስንት ምን ያክል ይፈጅብኛል \_\_\_\_\_ Minute

ክፍል ሁለት፡ የስነ ተዋልዶ ክፍል

9. ስንት ጊዜ አርግዘኛል 1. \_\_\_\_\_

10. ስንት ጊዜ ወልደኛል 1. \_\_\_\_\_

11. ከትትል አለሽ 1. አዎ 2. የለም

ክፍል ሶስት፡ የባህላዊ ልማድ እርግዝና ጊዜ

12. በእርግዝና ጊዜ የባህላዊ ልማድ ታደረገለሽ 1. አዎ 2. የለም

13. በእርግዝና ወቅት ምግብ ይከለክልሽ ነበር? 1. አዎ 2. የለም

14. አዎ ከሆነ የከለከልሽን የምግብ አይነት ዝርዝር

15. በእርግዝና ወቅት ያጋጠመሽ የጤና ችግር ነበረብሽ? 1. አዎ 2. የለም

16. አዎ ከሆነ ከየት ነው አገልግሎት የምታገኘው? 1. ከጤና ተቋም 2. ልምድ  
በሌላት ባህላዊ አዋላጅ 3. ልምድ ባላት ባህላዊ አዋላጅ 4. ከባቅህላዊ መድሃኒቶች  
5. ሌላ

17. ምን አይነት የባህላዊ ልምድ ታደረገለሽ? 1. ሆድ ማሸት 2. ተልባ መጠጣት 3. ኮሶ  
መጠጣት 4. ሌላ

ክፍል አራት፡ በወሊድ ጊዜ የሚደረጉ ባህላዊ ልማዶች

18. በወሊድ ጊዜ የባህላዊ ልምድ ታደረገለሽ? 1. አዎ 2. የለም

19. አዎ ካልሽ ምን አይነት? 1. ማህጸን ማሸት 2. ሆድ ማሸት 3. ሌላ

20. ከላይ የተጠቀሱትን ባህላዊ ልማዶች ልምድ አለሽ? 1. አዎ 2. የለም

21. አዎ ካልሽ ምን አይነት? 1. ሆድ ማሸት 2. ማህጸን ማሸት 3. ሌላ

22. የመጨረሻ ልጅሽን የተገላገልሽው የት ነው? 1. ቤት 2. የጤና ተቋም

23. ቤት ካልሽ ማን ተከታተለሽ? 1. ቤተሰብ 2. ጎረቤት 3. ሌላ

24. እትብት ለመቁረጥ ምን ተጠቀምሽ? 1. የተፈላ አዲስ ምላጭ 2. ከዚህ በፊት  
ያገለገለ ያልፀዳ ምላጭ 3. የተፈላ አዲስ ምላጭ 4. ከዚህ በፊት ያገለገለ የተፈላ  
ምላጭ 5. ሌላ

25. የእንግዶ ልጅ ለማስወጣት ምን አይነት ዘዴ ተጠቀምሽ 1. ሳይታሰብ በድንገት  
2. በማወዘወዝ/በማንቀጥቀጥ 3. ማህጸን በማሸት 4. በጉሮሮ ድምጽ  
በማሰማት 5. እንግዶ ልጁን በማሰር ከሆድ መለየት 6. ሌላ

26. እትብቱ ተያይዞ ነበር? 1. አዎ 2. አይ

27. አዎ ካልሽ ምን አይነት ክር ተጠቀምሽ? 1. የተፈላ ክር 2  ያልተጸዳ ክር 3  ሌላ  
28. ምን አይነት ልምድ ነበር የተጠቀምሽው እትብቱን ለመቁረጥ?

1. ምንም  2  የላም ፍግ 3  ቅቤ 4. ሌላ  
ክፍል አምስት: ባህላዊ ልማድ ከወሊድ በኋላ

በወሊድ በኋላ የ ባህላዊ ልምድ ታደረገለሽ? 1.አዎ 2  የላም

29. አዲስ ለተወለደው ልጅ ልክ እንደተወለደ ወዲያውኑ ምን ይሰጠዋል?

1. ቅቤ 2  የላም ወተት 3  ውሃ 4  ምንም 5  ሌላ

30. መቼ ነው ልጁ ጡት መጥባት የሚጀምረው?

1. ወዲያውኑ (በ 1 ሰአት ውስጥ) 2  ከ 1-24 ሰአት ውስጥ 3  ከ 24 ሰአት በኋላ  
4  ሌላ

31. አዲስ ለተወለደው ልጅ እንገር ትሰጪዋለሽ? 1  አዎ 2  የላም

32. አይ ካልሽ ለምን?

33. ልጁ ከተወለደ በኋላ መቼ ይታጠባል? 1  ወዲያውኑ( በ 1 ሰአት ውስጥ) 2   
ከ 1-24 ሰአት በኋላ 3  ከ 1-24 ሰአት ውስጥ 4  ሌላ

34. የጤና ችግር ነበረብሽ? 1. አዎ 2  የላም

35. አዎ ካልሽ እርዳታ ከየት አገኘሽ? 1. ከጤና ተቋም 2  ከእምነት 3  ከባህላዊ  
መድሃኒቶች 4  ሌላ

ለነበረን ቆይታ አመሰግናልሁ !!!
